# Supplementary material
Source: publisher figshare collection journal article supplement (https://tandf.figshare.com/articles/dataset/_/14039112)

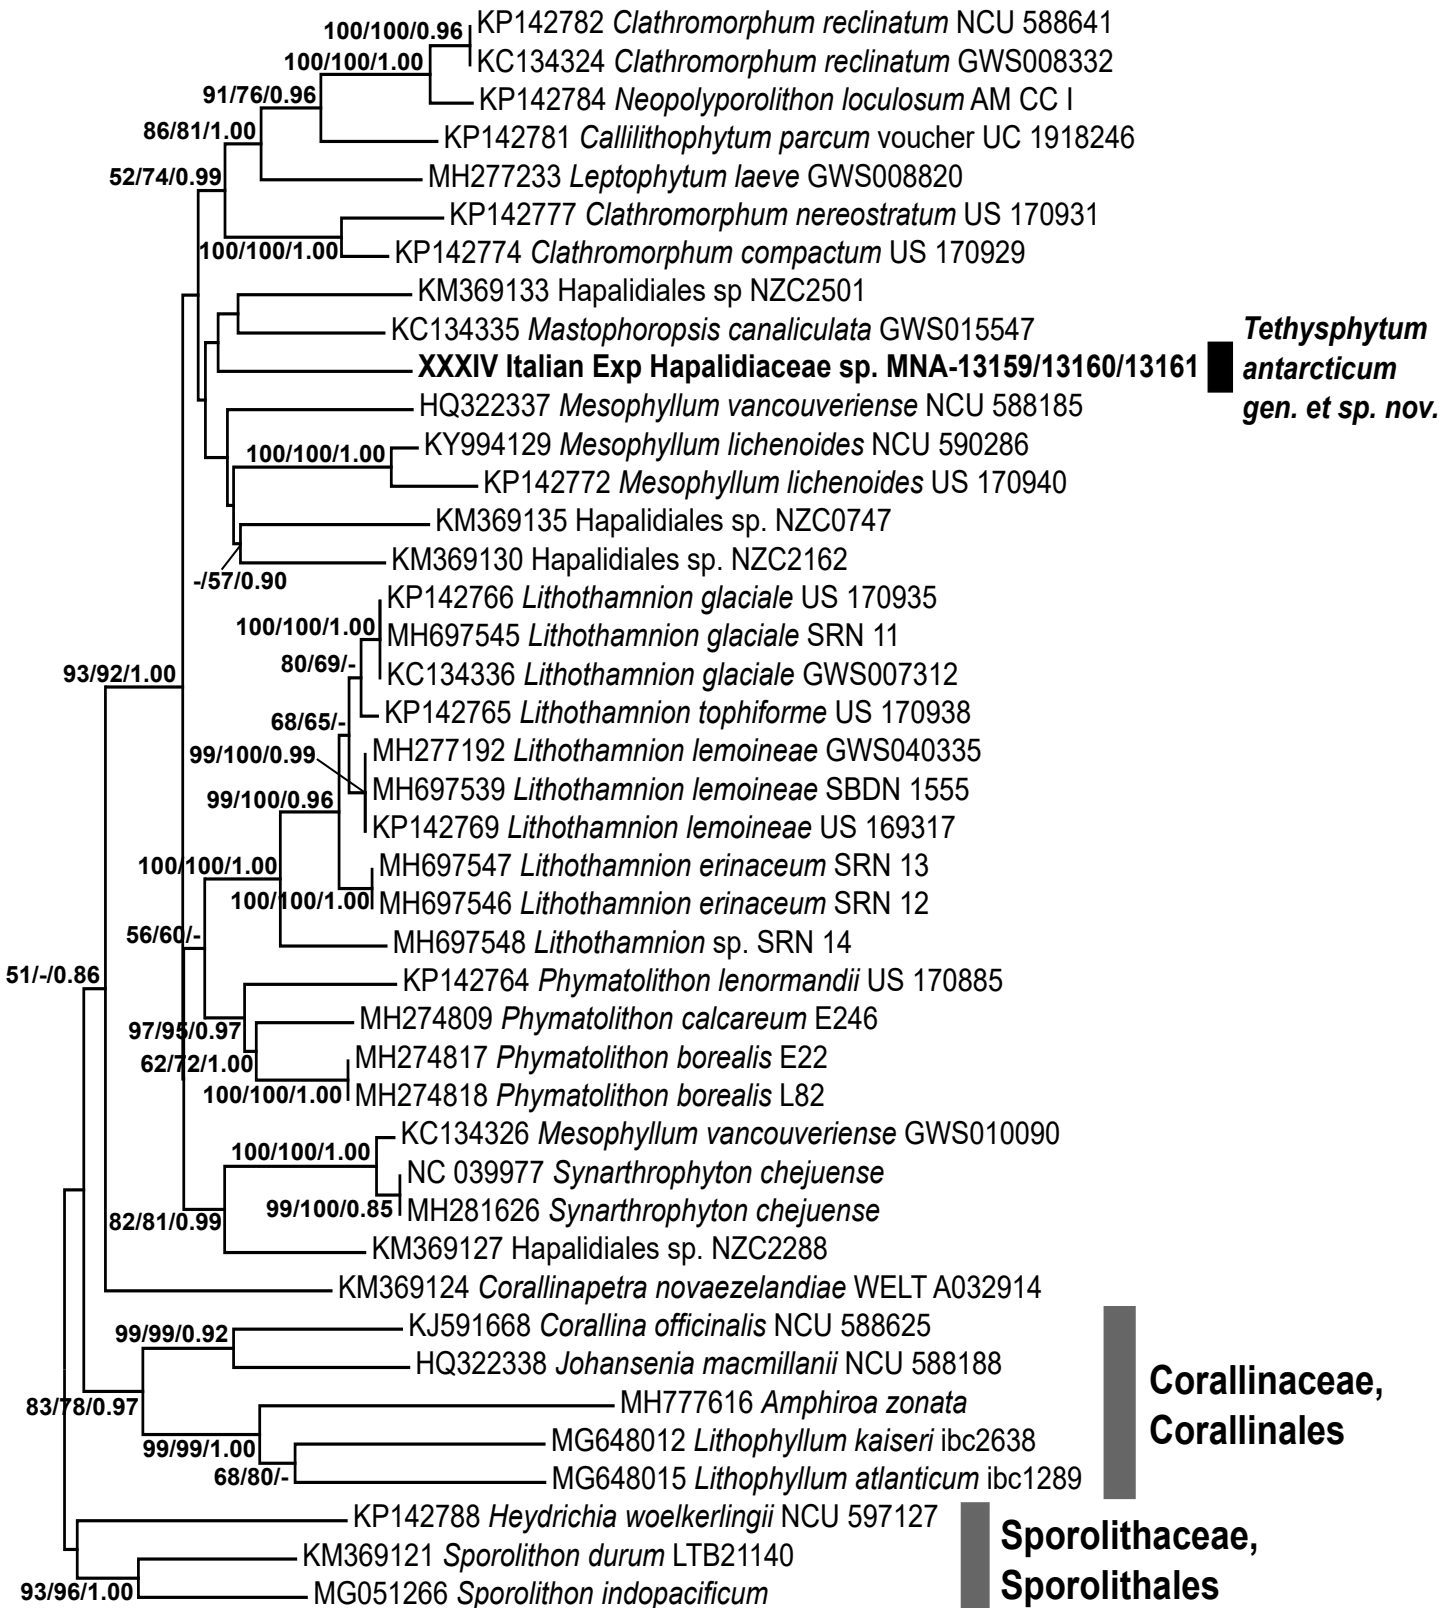

Supplement: Supplementary file 1 [file 1]

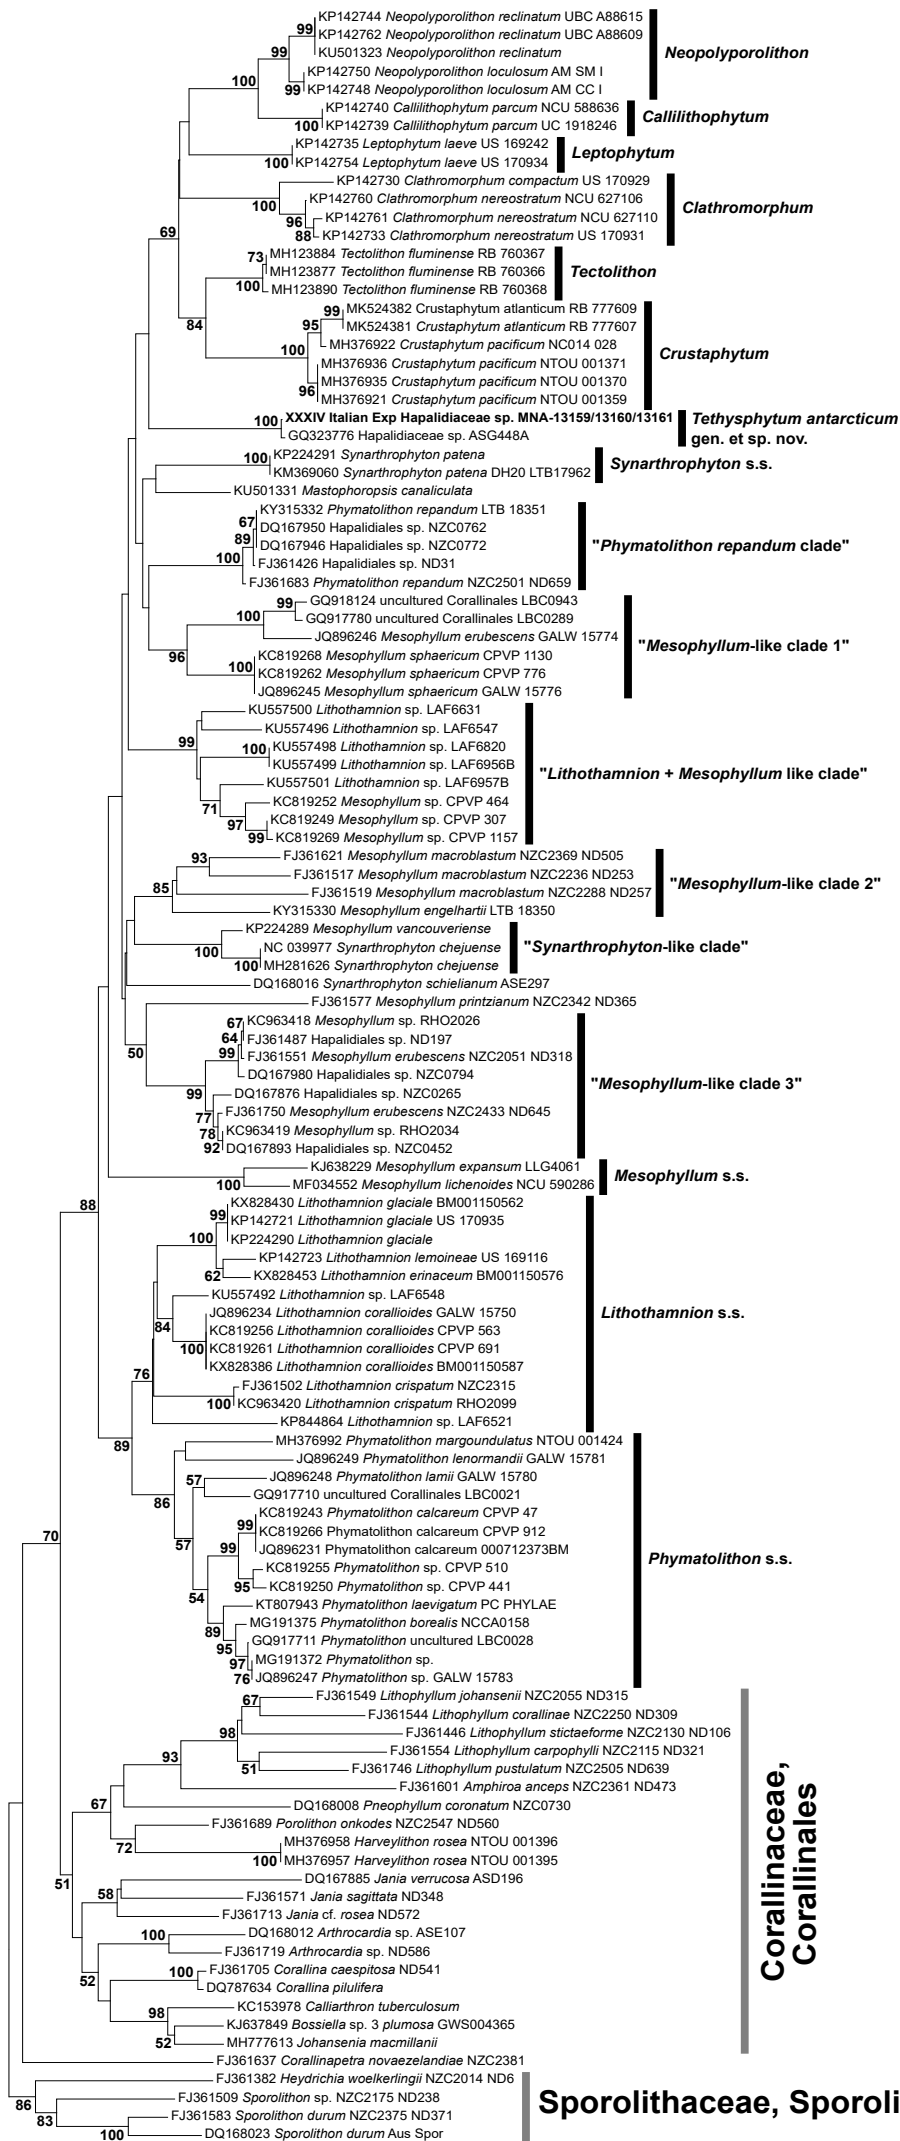

## Hapalidiaceae, Hapalidiales

## Corallinales, Corallinales

## Sporolithaceae, Sporolithales

0.01

Supplement: Supplementary file 2 [file 1]

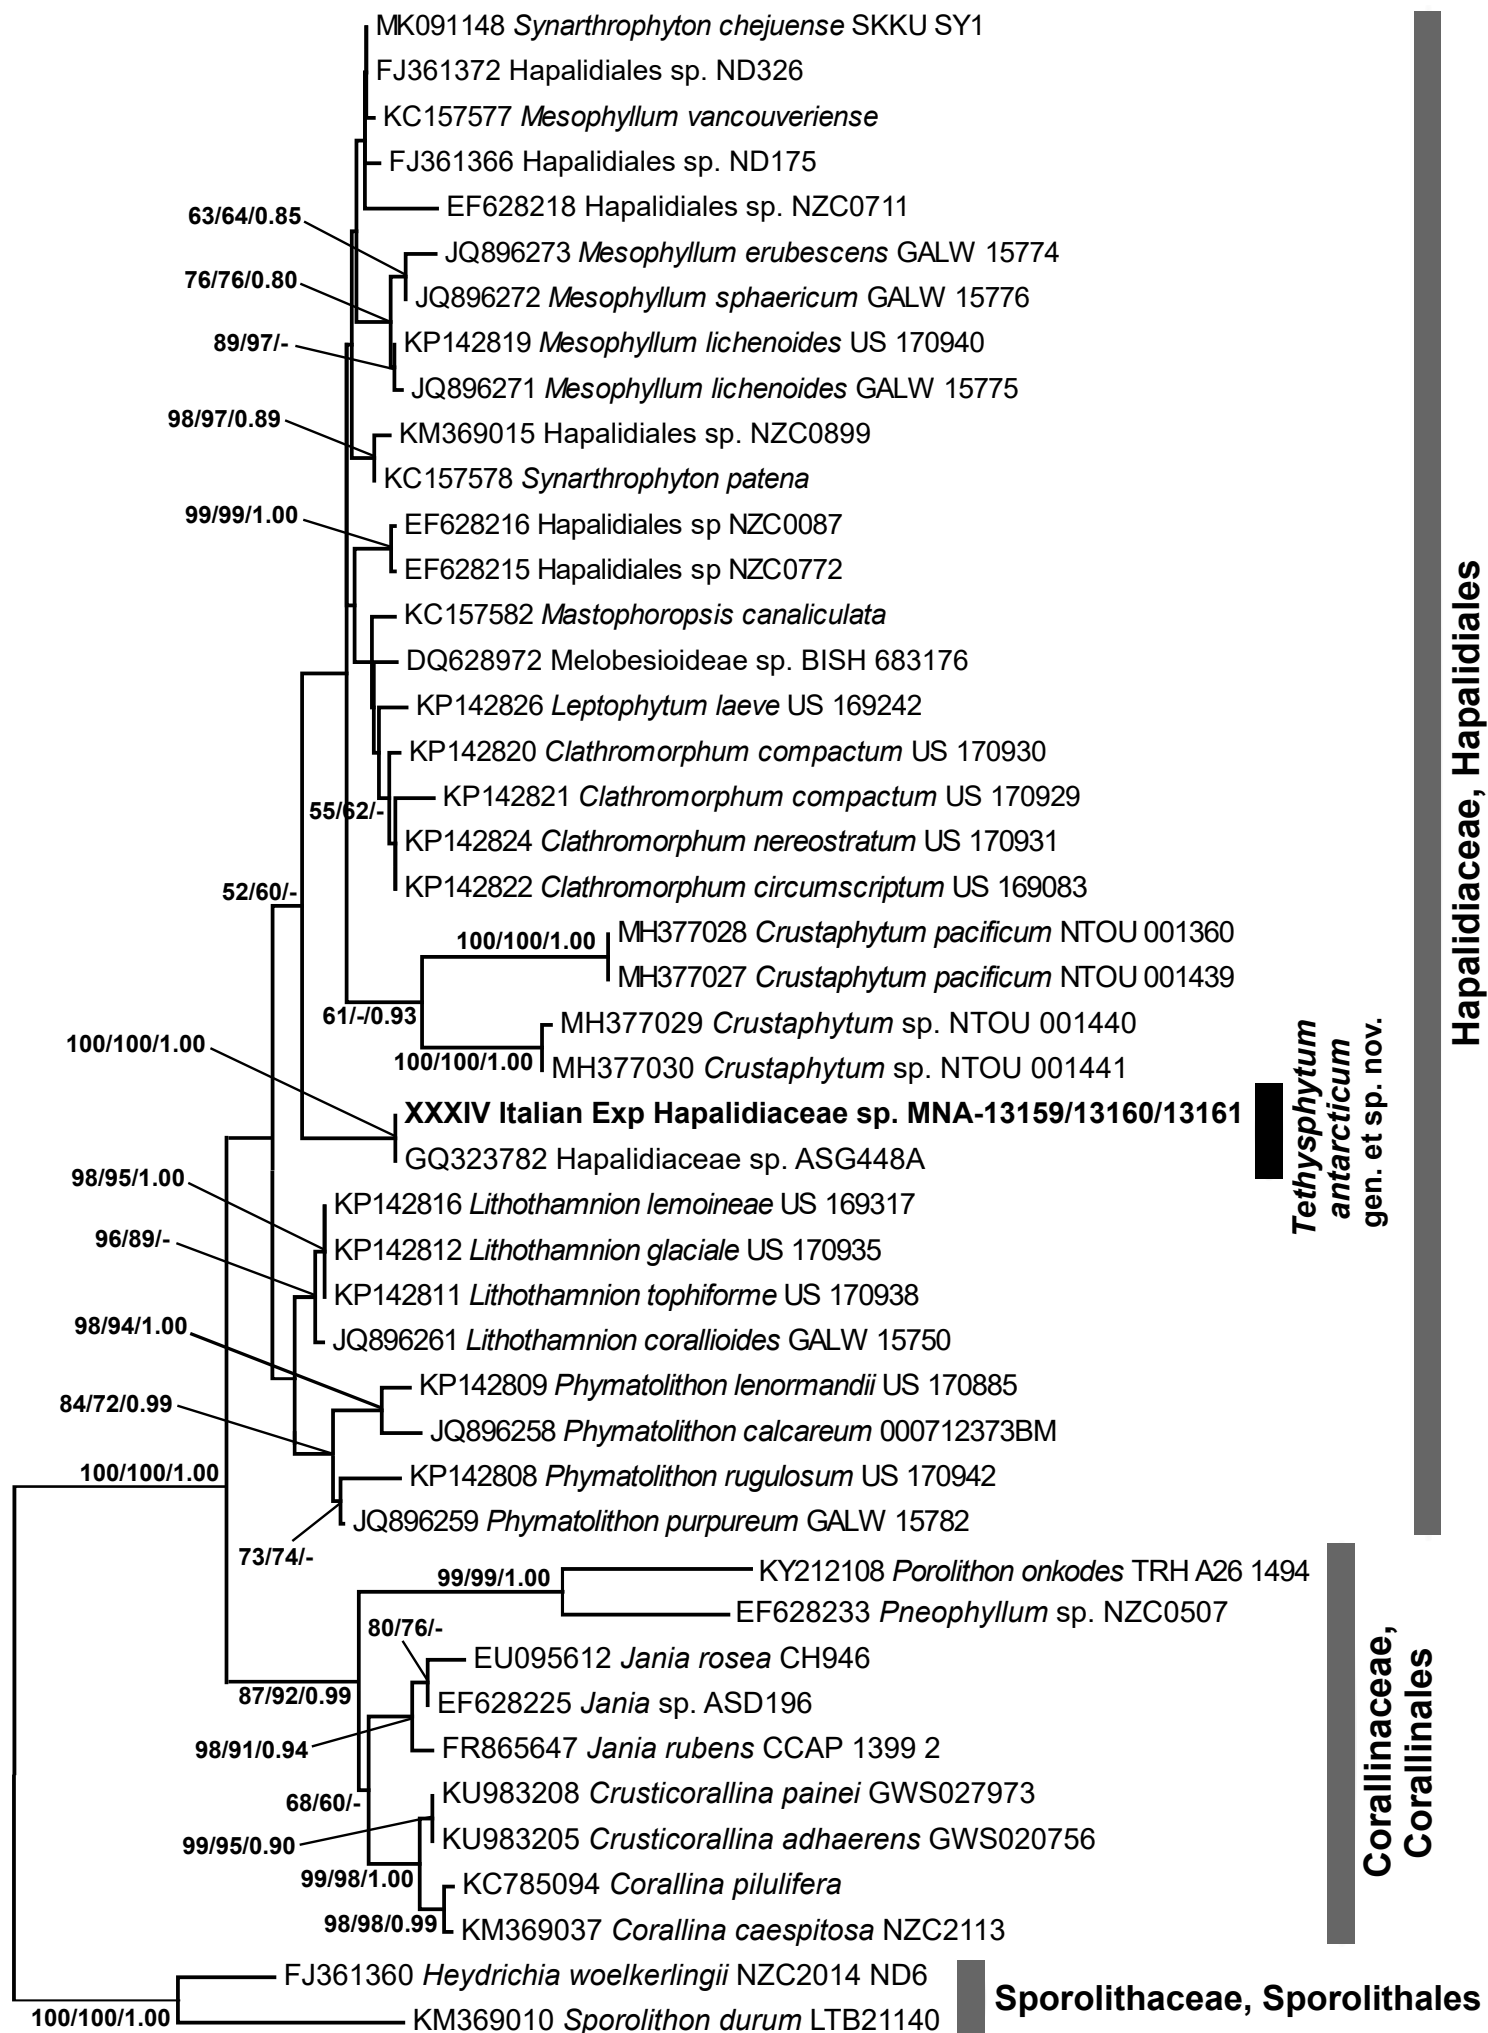

Supplement: Supplementary file 3 [file 1]
